# Supplementary material
Source: PubMed Central journal article supplement (PMC3650853)

**Supporting Information****Novel 1',1'-Chain Substituted Hexahydrocannabinols: 9 $\beta$ -Hydroxy-3-(1-hexyl-cyclobut-1-yl)-hexahydrocannabinol (AM2389) a Highly Potent Cannabinoid Receptor 1 (CB1) Agonist.**

Spyros P. Nikas,<sup>\*,†</sup> Shakiru O. Alapafuja,<sup>†</sup> Ioannis Papanastasiou,<sup>†</sup> Carol A. Paronis,<sup>†</sup> Vidyanand G. Shukla,<sup>†</sup> Demetris P. Papahatjis,<sup>‡</sup> Anna L. Bowman,<sup>†</sup> Aneetha Halikhedkar,<sup>†</sup> Xiuwen Han,<sup>†</sup> and Alexandros Makriyannis.<sup>\*,†</sup>

<sup>†</sup>Center for Drug Discovery, Northeastern University, 116 Mugar Life Sciences Building, 360 Huntington Avenue, Boston, MA, 02115, USA.

<sup>‡</sup>Institute of Organic and Pharmaceutical Chemistry, National Hellenic Research Foundation, 48 Vass. Constantinou, Athens 116-35 Greece.

---

\* To whom correspondence should be addressed

<sup>†</sup> Center for Drug Discovery, Northeastern University.

Alexandros Makriyannis: Tel.: +1-617-373-4200; fax: +1-617-373-7493; e-mail: a.makriyannis@neu.edu.

Spyros P. Nikas: Tel. +1-617-373-3125; fax: +1-617-373-7493; e-mail: s.nikas@neu.edu

## Table of Contents

|                                                                                                                                                 |    |
|-------------------------------------------------------------------------------------------------------------------------------------------------|----|
| Table 1S. Elemental analyses.....                                                                                                               | S2 |
| Reproductions of <sup>1</sup> H NMR, <sup>13</sup> C NMR, <sup>13</sup> C DEPT, COSY, HSQC, HMBC, and NOESY spectra of compound <b>5b</b> ..... | S4 |

**Table 1S:** Elemental analyses

| Compd.     | Mol. Formula                                                  | Calcd.            | Found             |
|------------|---------------------------------------------------------------|-------------------|-------------------|
| <b>5a</b>  | C <sub>26</sub> H <sub>36</sub> O <sub>3</sub>                | C: 78.75, H: 9.15 | C: 78.46, H: 8.80 |
| <b>5b</b>  | C <sub>26</sub> H <sub>38</sub> O <sub>3</sub>                | C: 78.35, H: 9.61 | C: 78.04, H: 9.84 |
| <b>5c</b>  | C <sub>24</sub> H <sub>34</sub> O <sub>3</sub> S <sub>2</sub> | C: 66.32, H: 7.88 | C: 66.57, H: 8.10 |
| <b>5d</b>  | C <sub>25</sub> H <sub>34</sub> O <sub>3</sub>                | C: 78.49, H: 8.96 | C: 78.16, H: 9.19 |
| <b>5e</b>  | C <sub>25</sub> H <sub>36</sub> O <sub>3</sub>                | C: 78.08, H: 9.44 | C: 77.77, H: 9.69 |
| <b>6a</b>  | C <sub>26</sub> H <sub>36</sub> O <sub>3</sub>                | C: 78.75, H: 9.15 | C: 78.51, H: 8.87 |
| <b>6b</b>  | C <sub>26</sub> H <sub>38</sub> O <sub>3</sub>                | C: 78.35, H: 9.61 | C: 78.64, H: 9.83 |
| <b>6c</b>  | C <sub>24</sub> H <sub>34</sub> O <sub>3</sub> S <sub>2</sub> | C: 66.32, H: 7.88 | C: 66.65, H: 7.53 |
| <b>6d</b>  | C <sub>25</sub> H <sub>34</sub> O <sub>3</sub>                | C: 78.49, H: 8.96 | C: 78.74, H: 8.71 |
| <b>6e</b>  | C <sub>25</sub> H <sub>36</sub> O <sub>3</sub>                | C: 78.08, H: 9.44 | C: 77.77, H: 9.79 |
| <b>14a</b> | C <sub>24</sub> H <sub>33</sub> BrO <sub>3</sub>              | C: 64.14, H: 7.40 | C: 64.51, H: 7.51 |
| <b>14b</b> | C <sub>25</sub> H <sub>35</sub> BrO <sub>3</sub>              | C: 64.79, H: 7.61 | C: 64.50, H: 7.95 |
| <b>14c</b> | C <sub>26</sub> H <sub>37</sub> BrO <sub>3</sub>              | C: 65.40, H: 7.81 | C: 65.69, H: 8.02 |
| <b>15a</b> | C <sub>24</sub> H <sub>33</sub> BrO <sub>3</sub>              | C: 64.14, H: 7.40 | C: 63.78, H: 7.15 |

|                              |                      |                            |                            |
|------------------------------|----------------------|----------------------------|----------------------------|
| <b>15b</b>                   | $C_{25}H_{35}BrO_3$  | C: 64.79, H: 7.61          | C: 65.05, H: 7.92          |
| <b>15c</b>                   | $C_{26}H_{37}BrO_3$  | C: 65.40, H: 7.81          | C: 65.71, H: 7.15          |
| <b>16</b>                    | $C_{25}H_{33}NO_3$   | C: 75.91, H: 8.41, N: 3.54 | C: 75.55, H: 8.13, N: 3.18 |
| <b>22</b>                    | $C_{24}H_{33}BrO_3$  | C: 64.14, H: 7.40          | C: 64.06, H: 7.14          |
| <b>7c-<math>\beta</math></b> | $C_{24}H_{36}O_3S_2$ | C: 66.01, H: 8.31          | C: 66.39, H: 8.64          |
| <b>7e-<math>\beta</math></b> | $C_{25}H_{38}O_3$    | C: 77.68, H: 9.91          | C: 78.03, H: 10.21         |
| <b>23</b>                    | $C_{24}H_{35}BrO_3$  | C: 63.85, H: 7.81          | C: 64.15, H: 7.62          |
| <b>24</b>                    | $C_{24}H_{35}BrO_3$  | C: 63.85, H: 7.81          | C: 63.58, H: 7.59          |

---

$^1\text{H}$  NMR,  $^{13}\text{C}$  NMR,  $^{13}\text{C}$  DEPT, COSY, HSQC, HMBC, and NOESY spectra of compound **5b**.

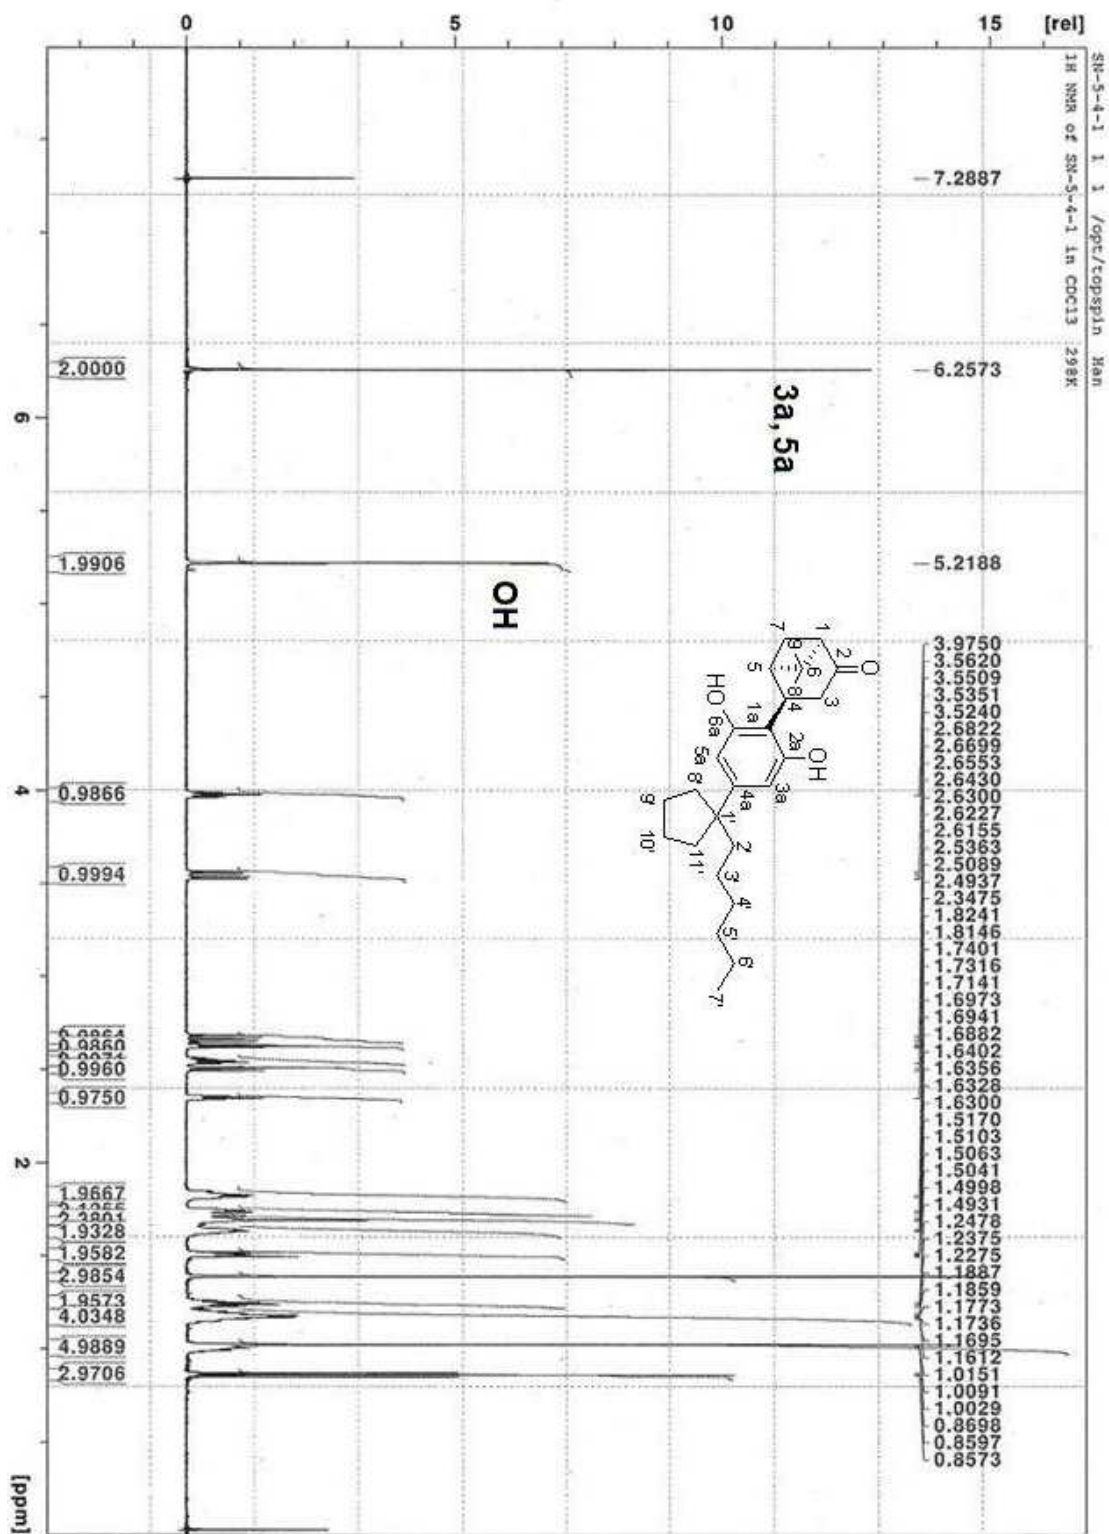

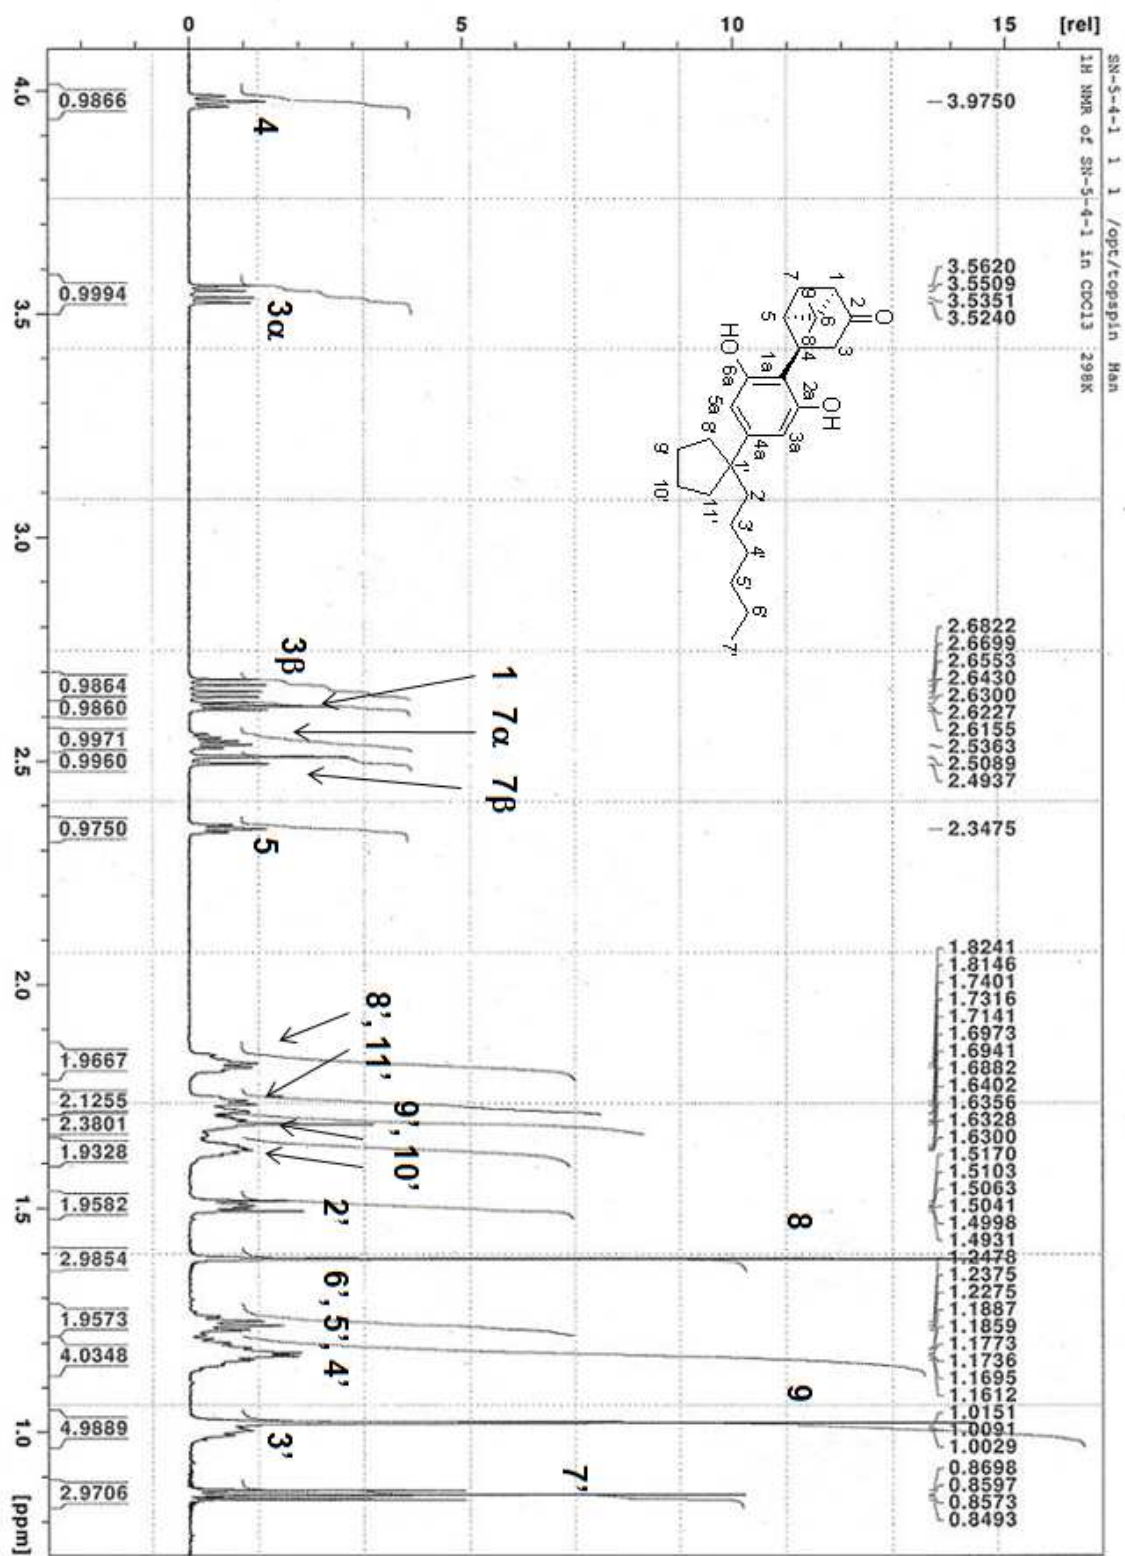

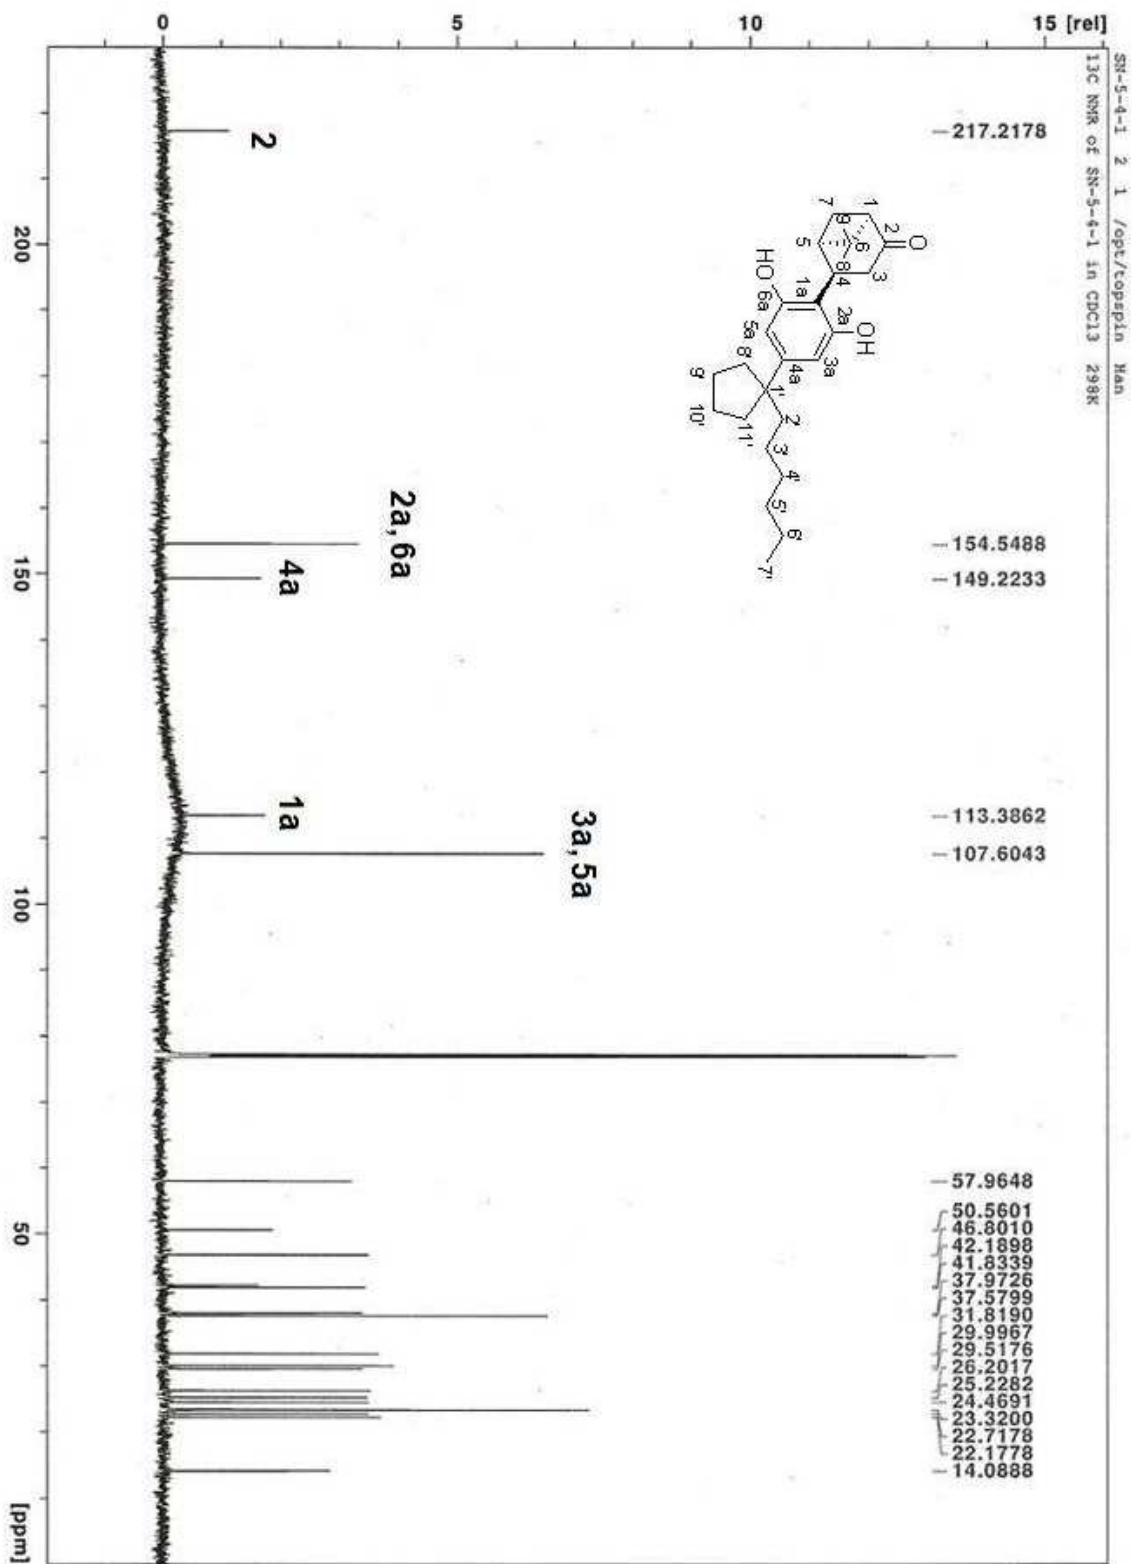

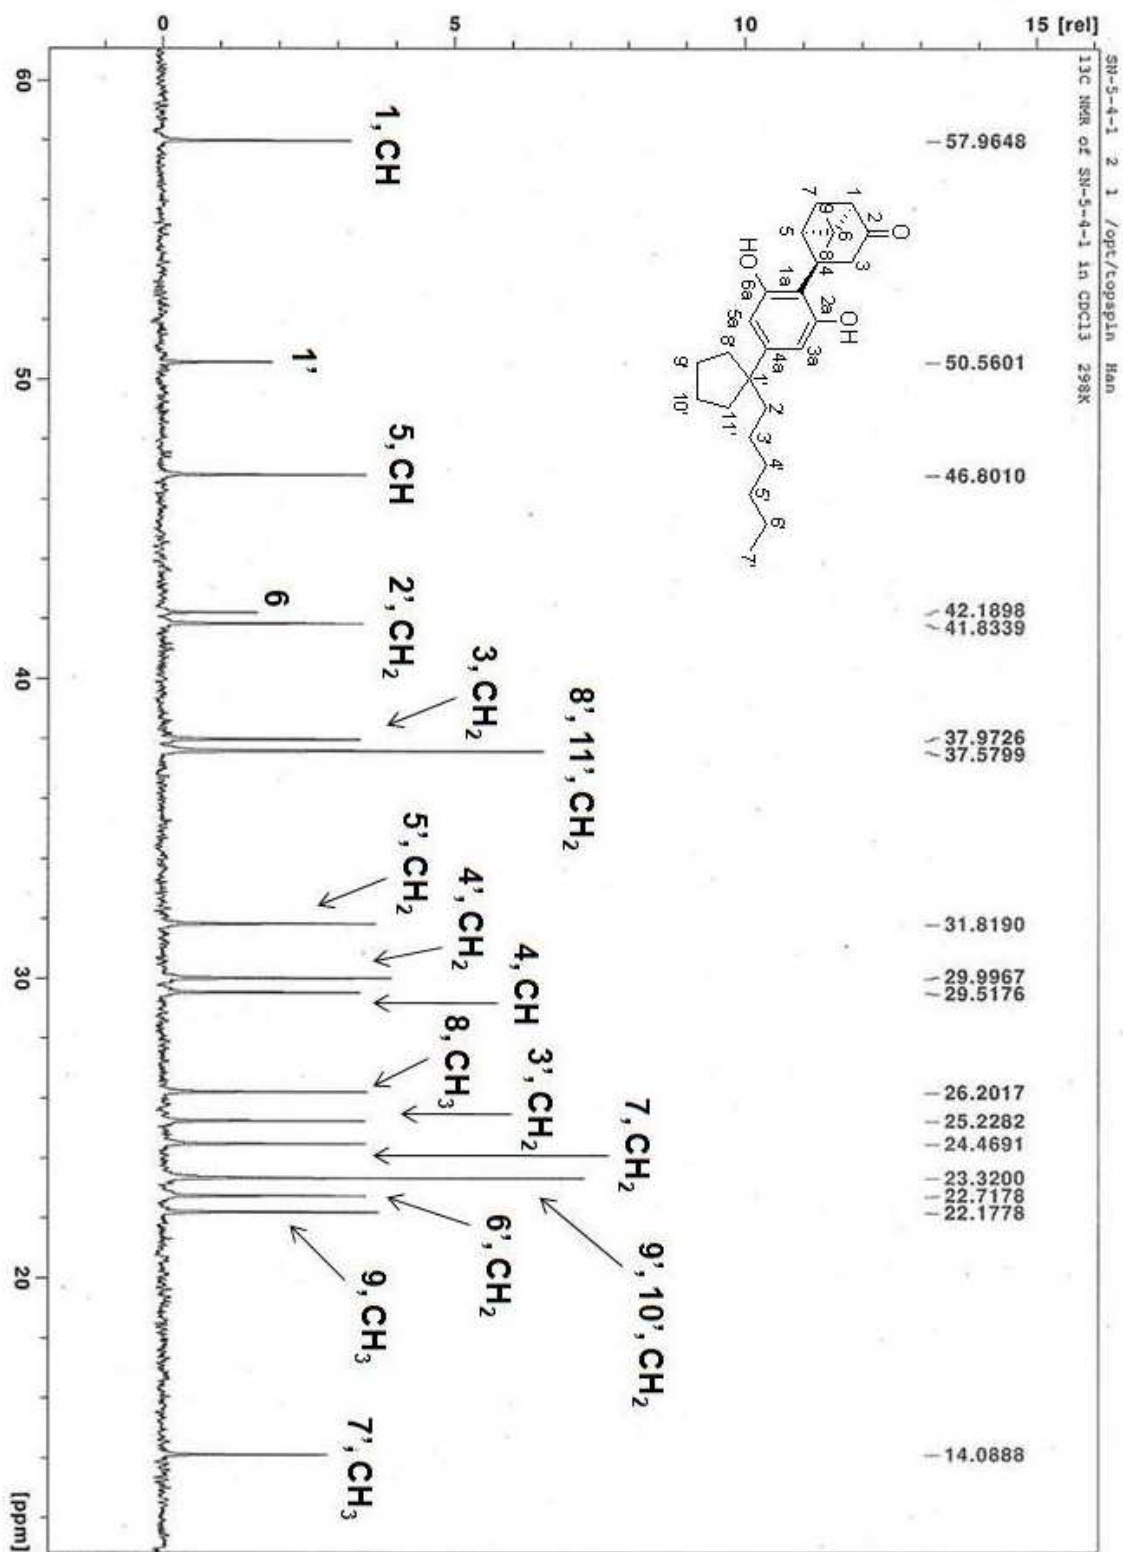

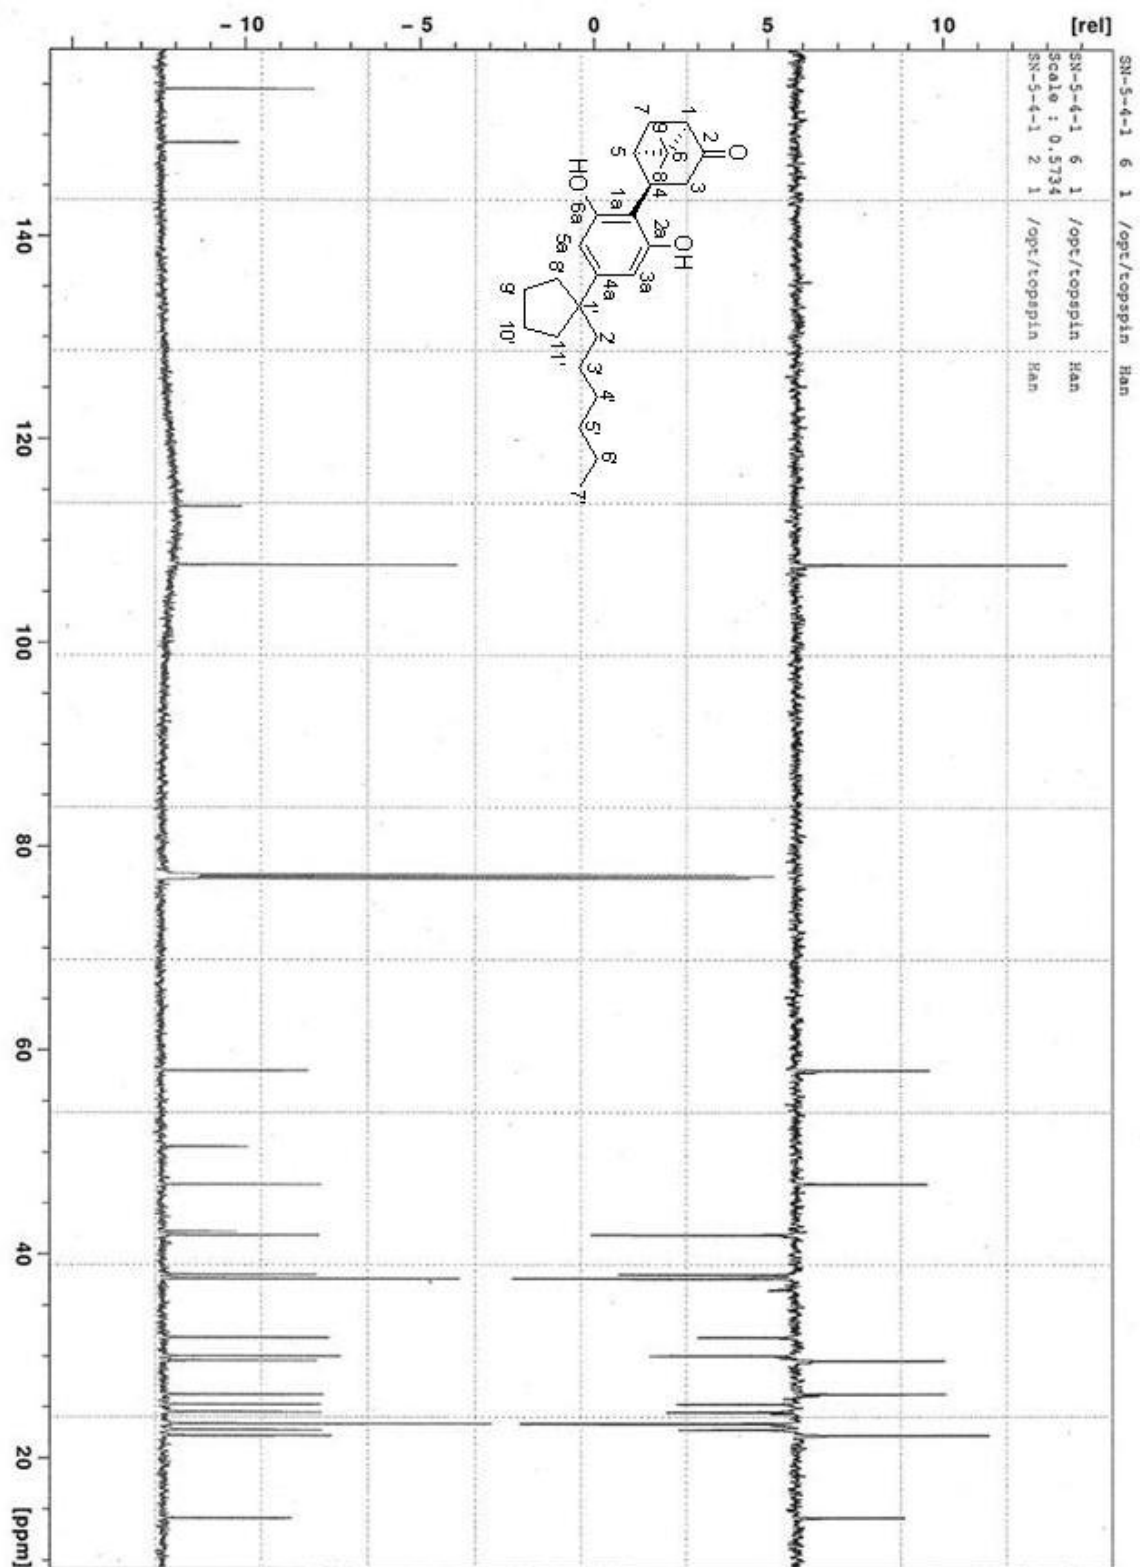



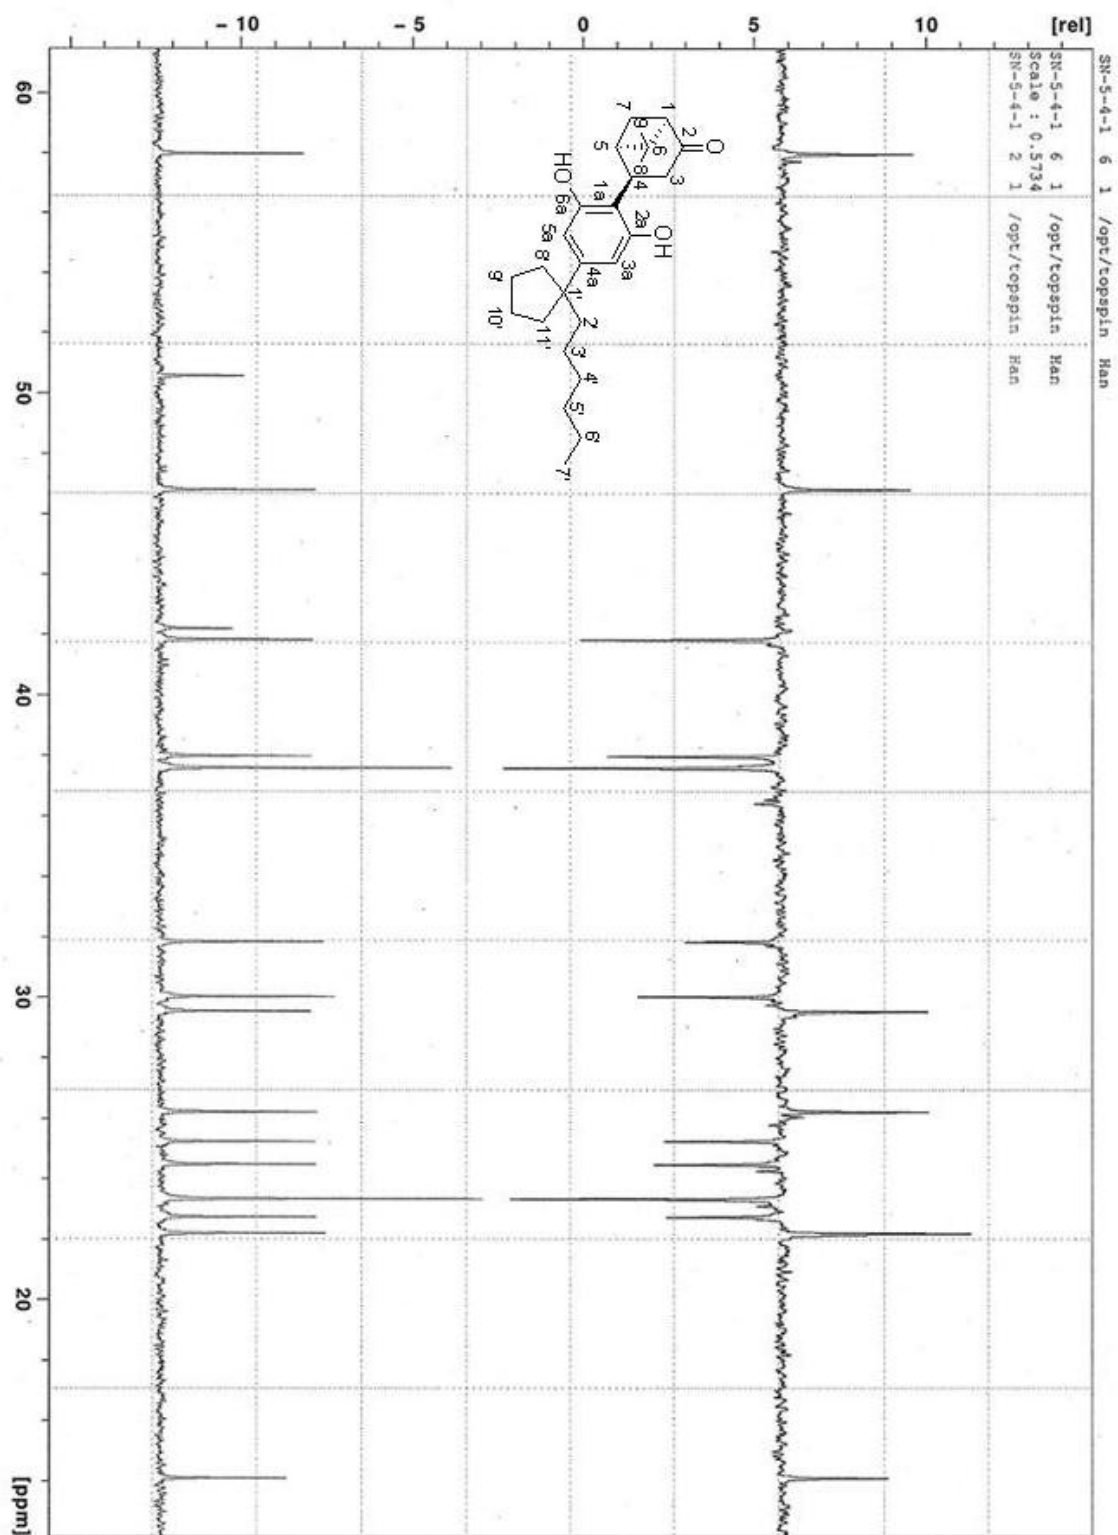

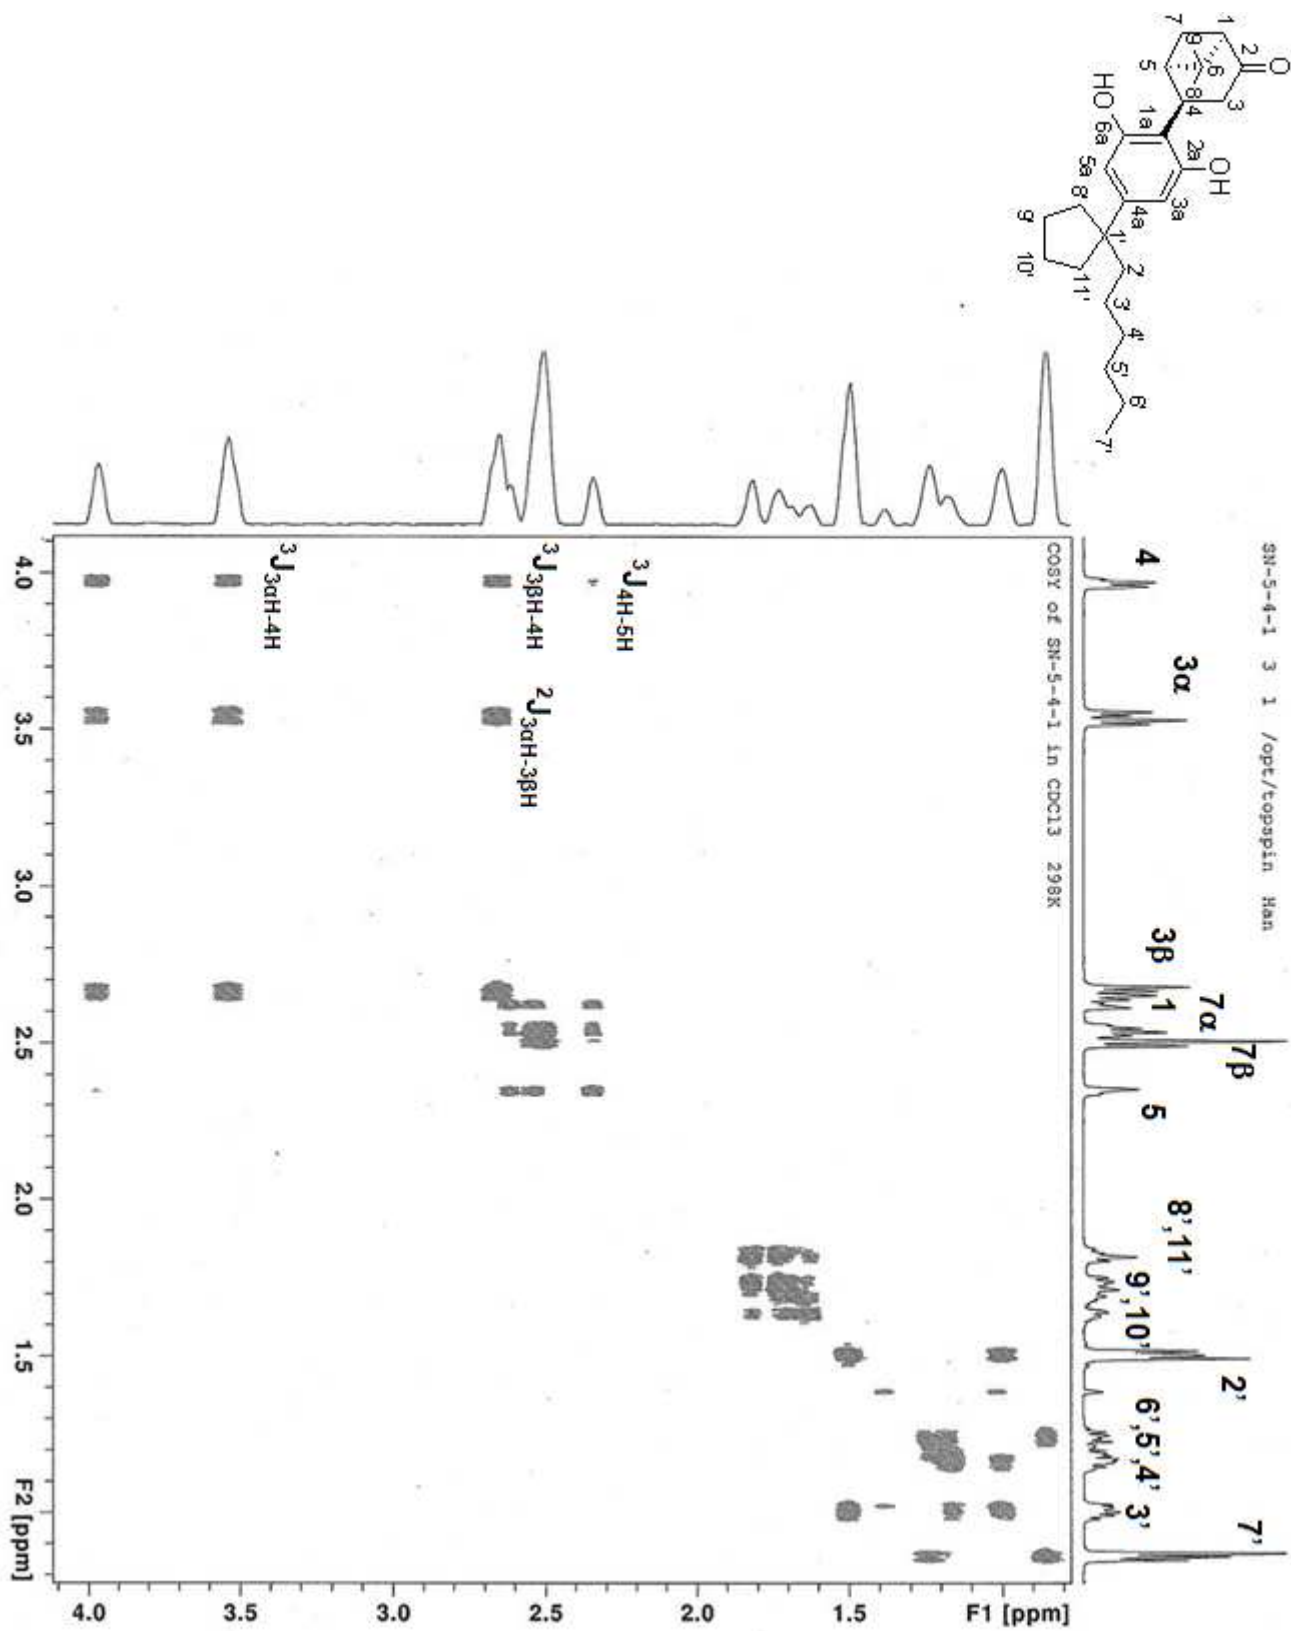

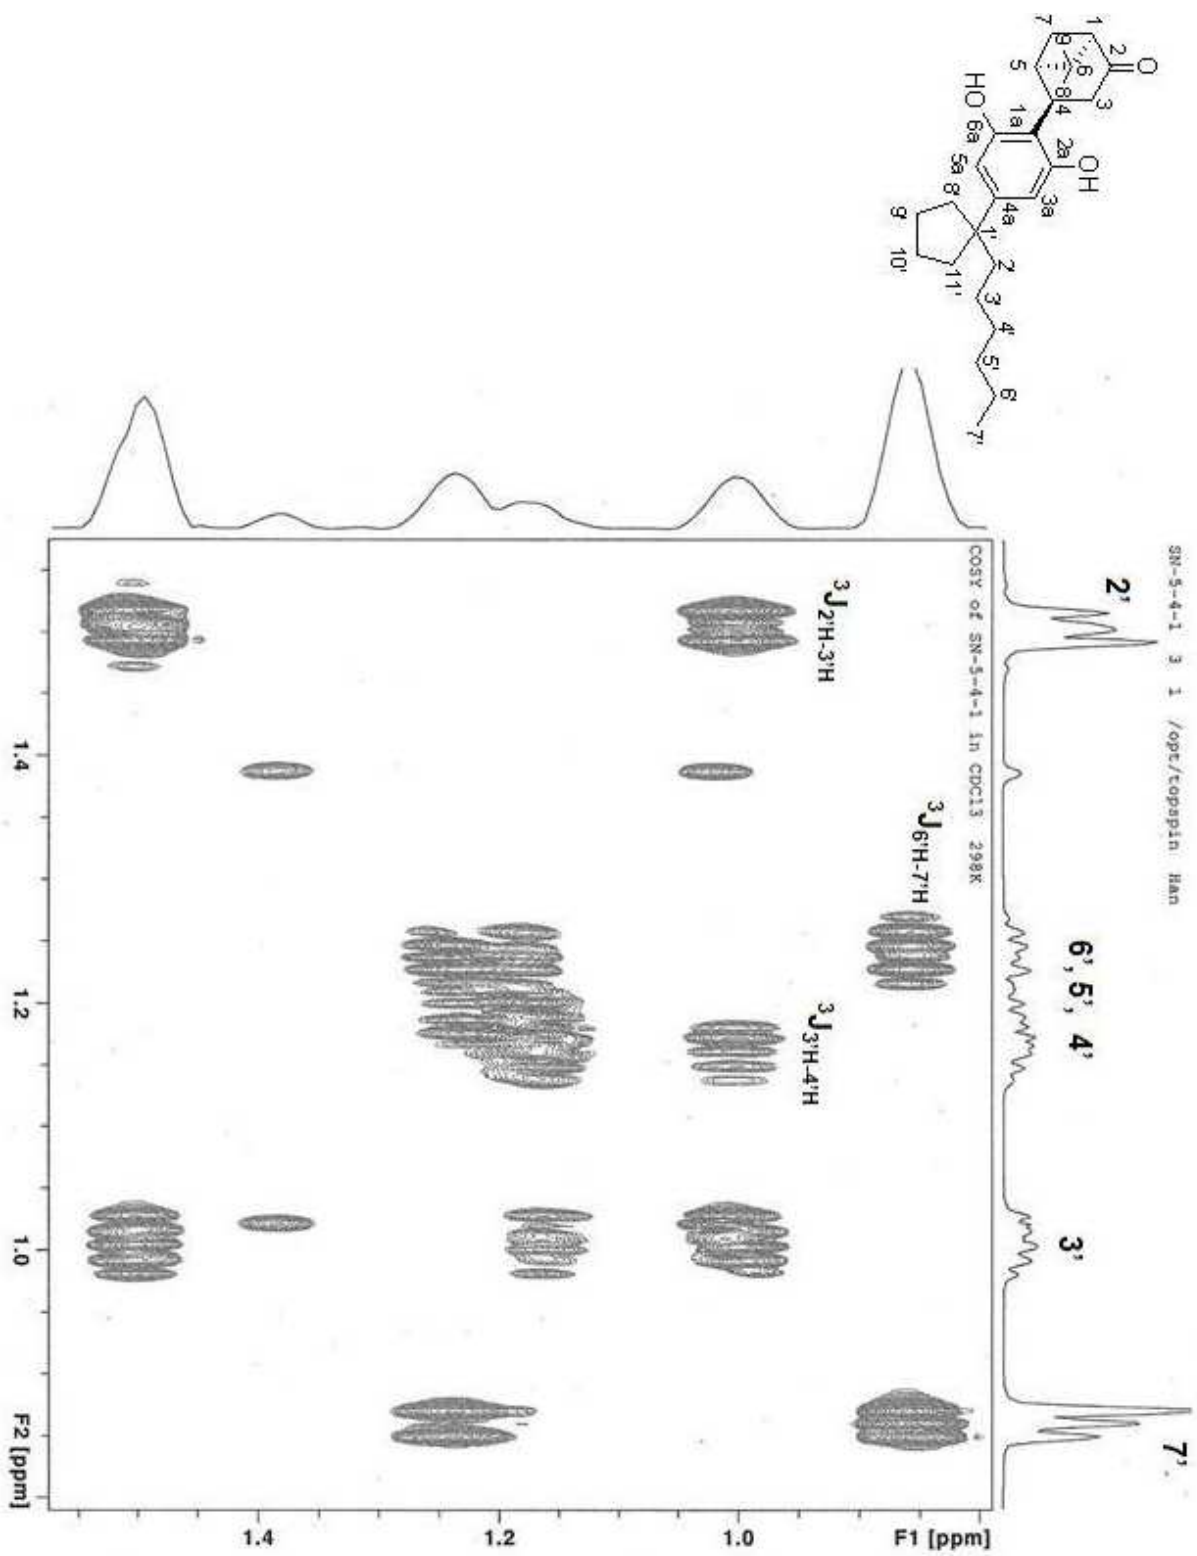

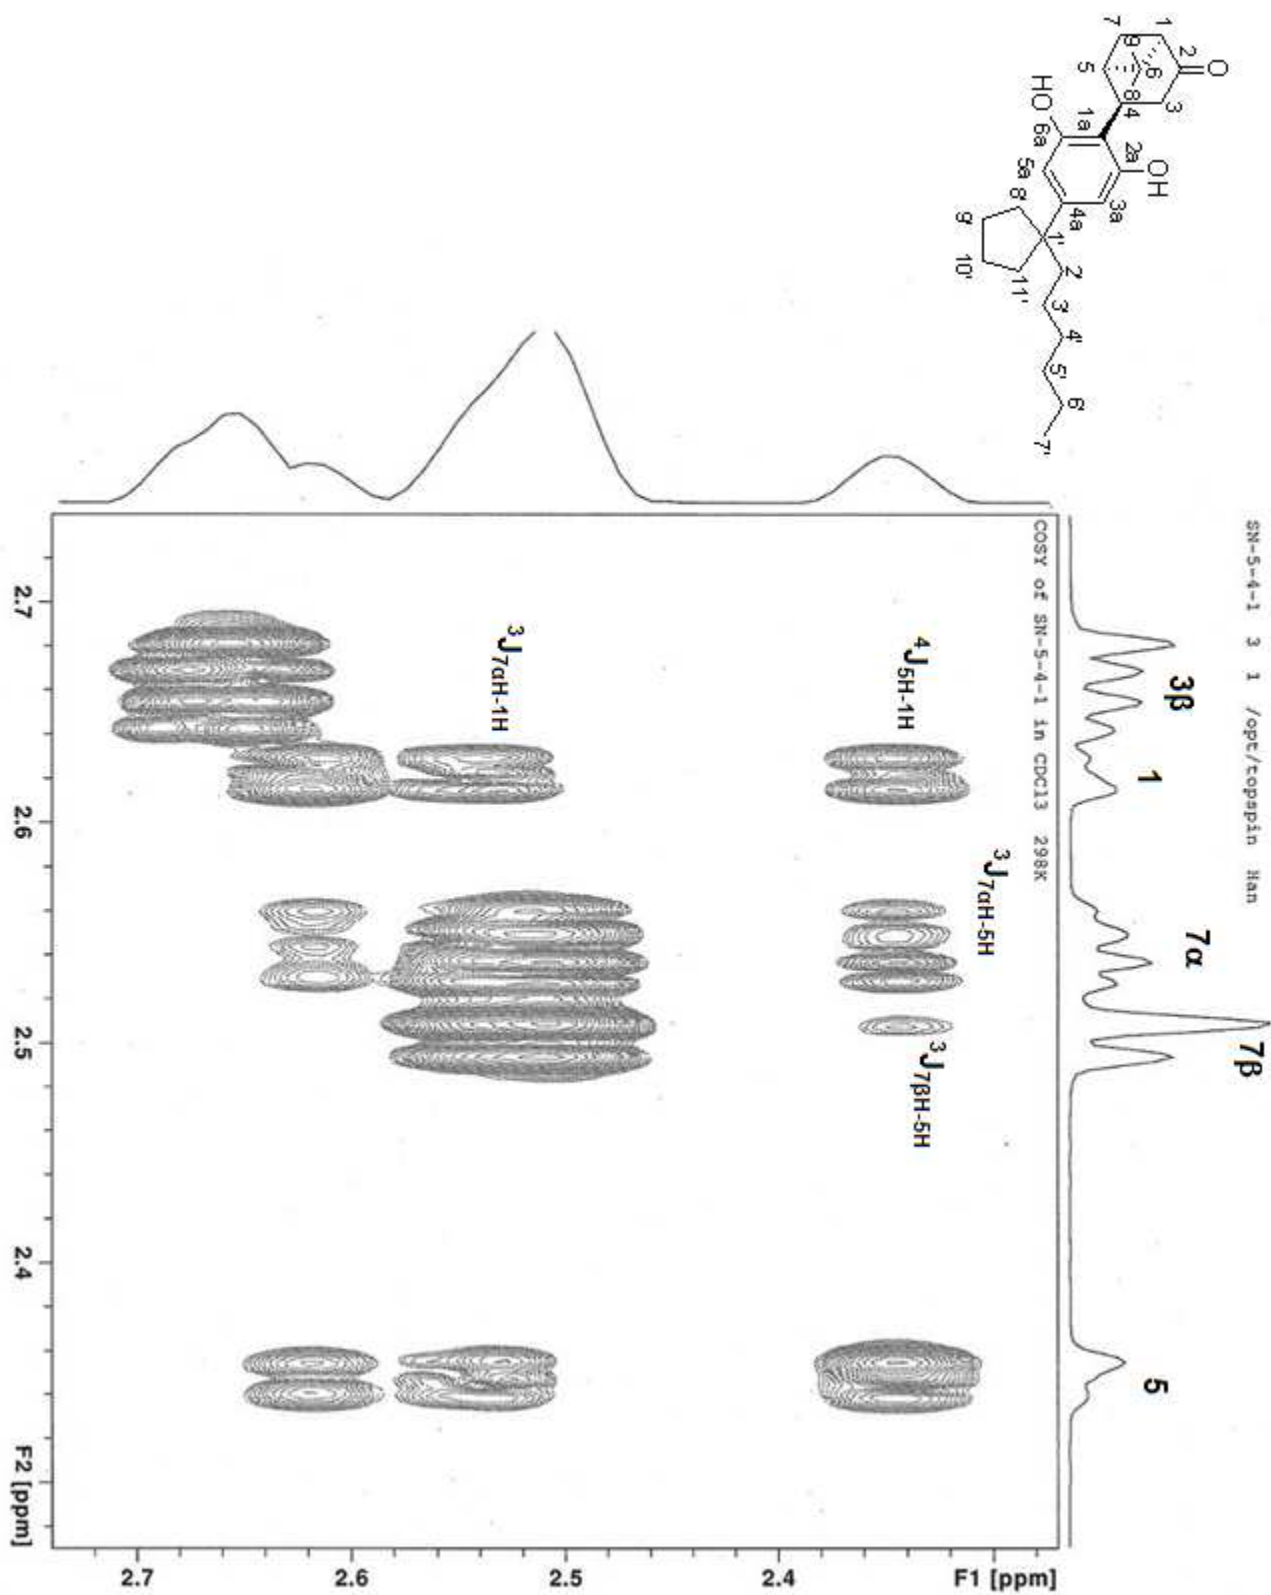

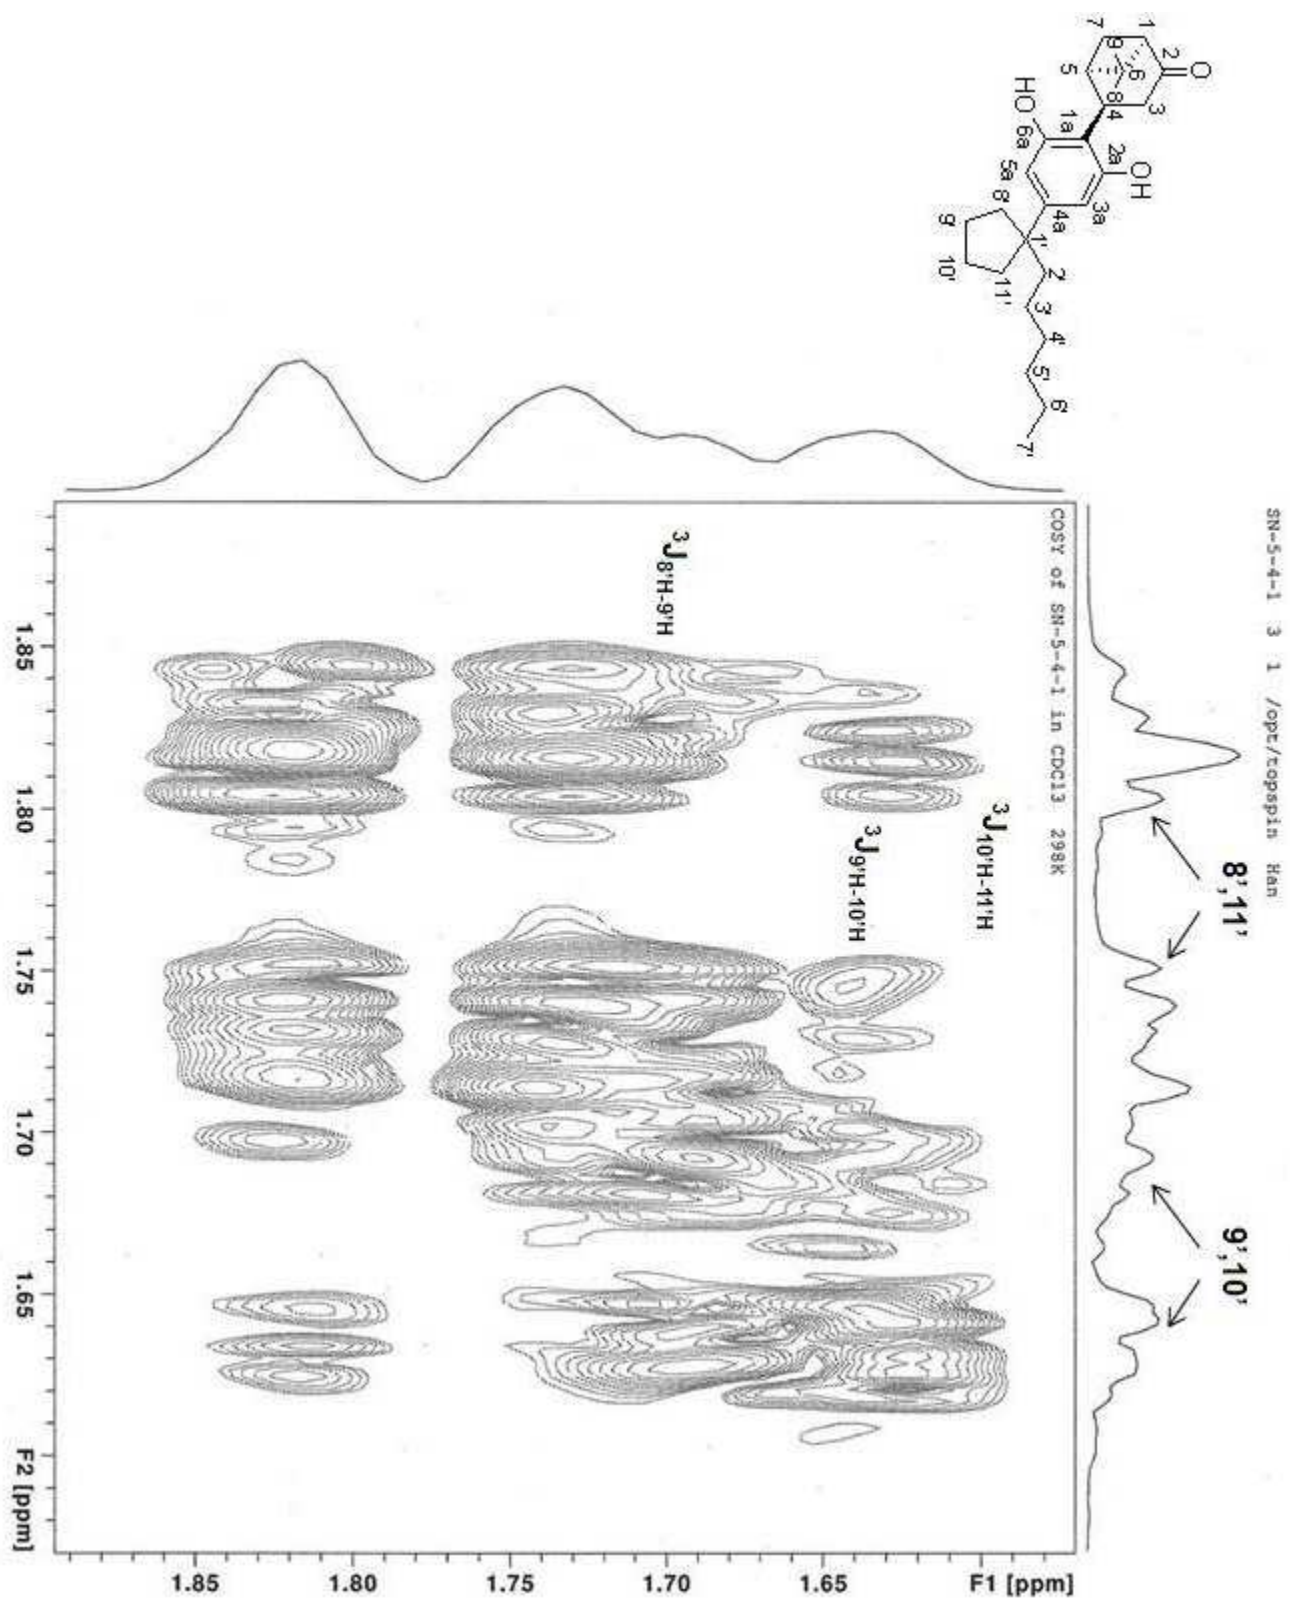

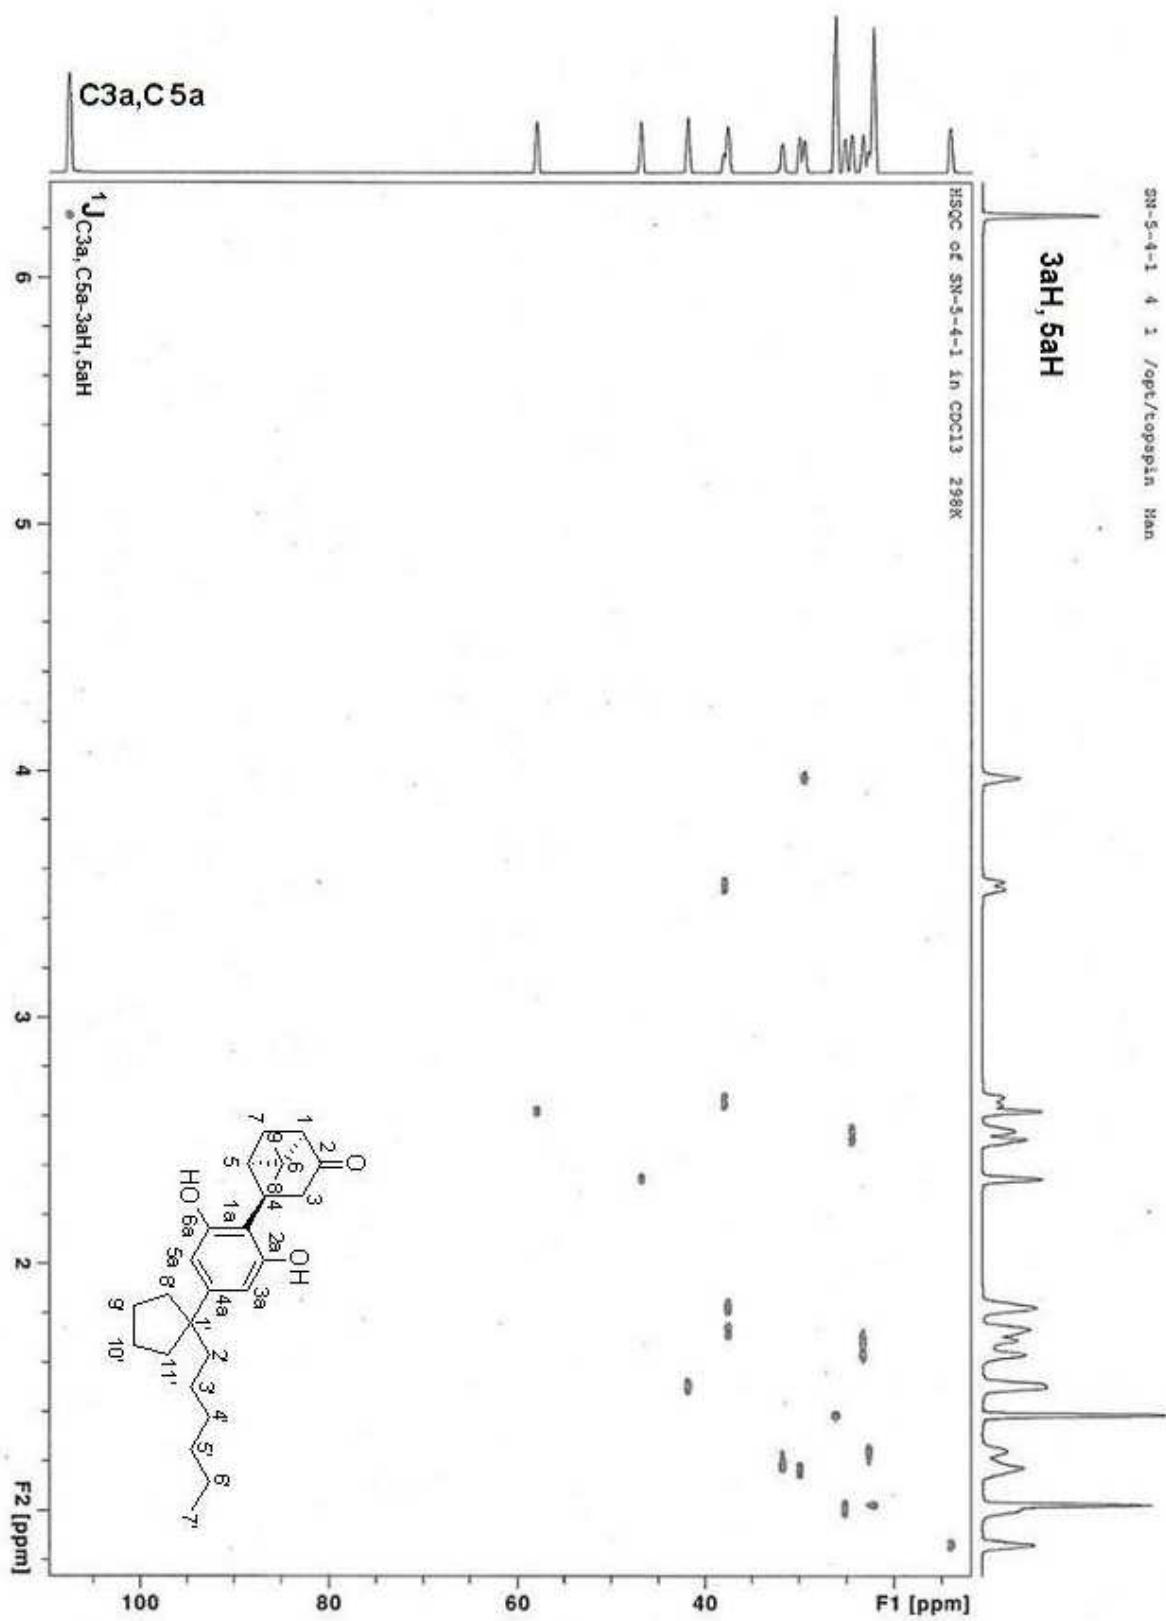

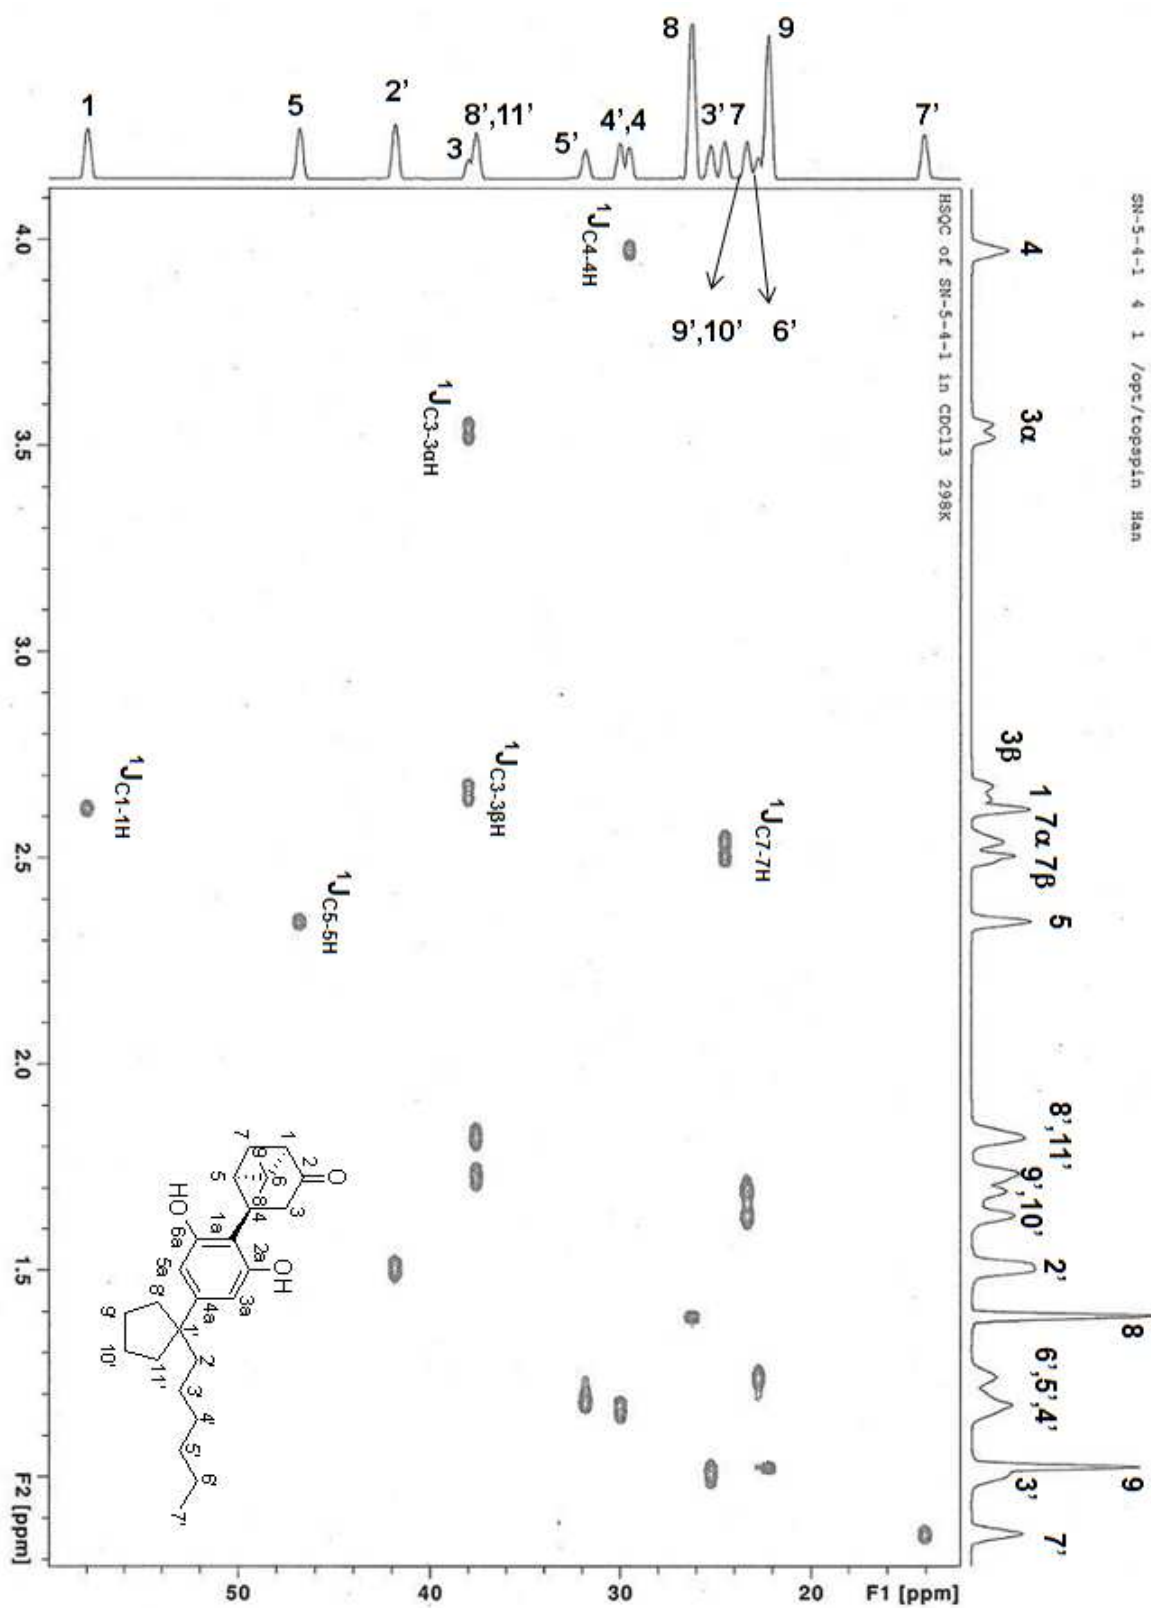

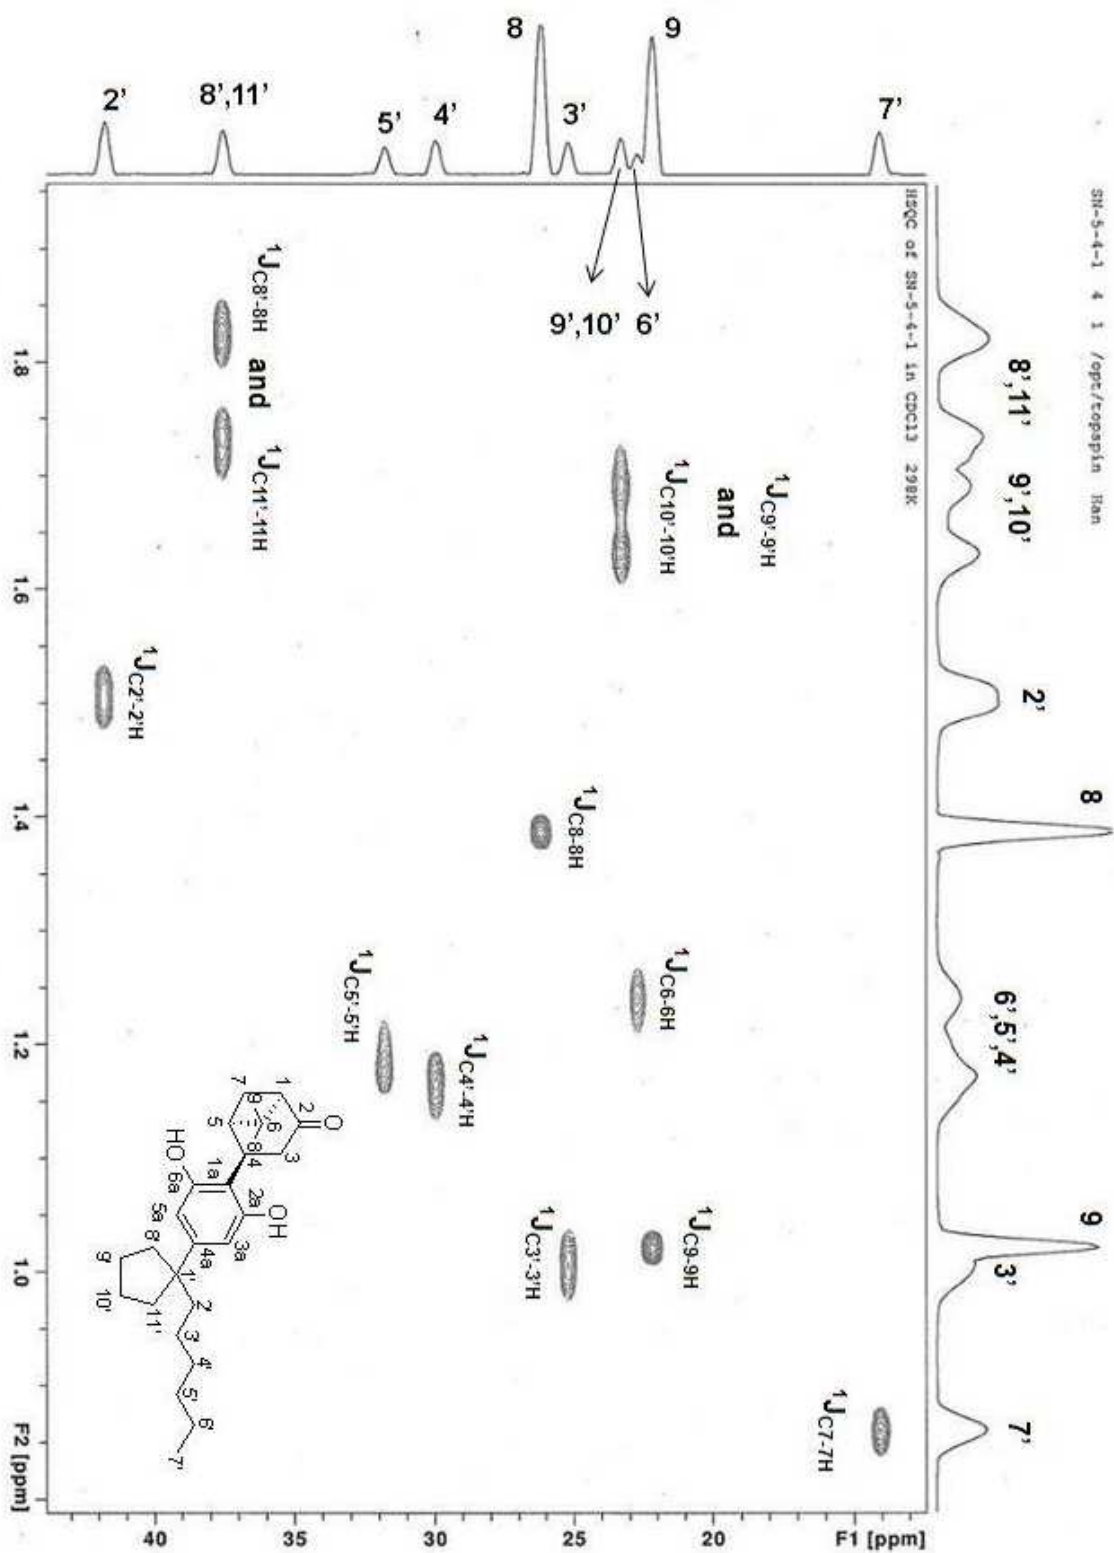



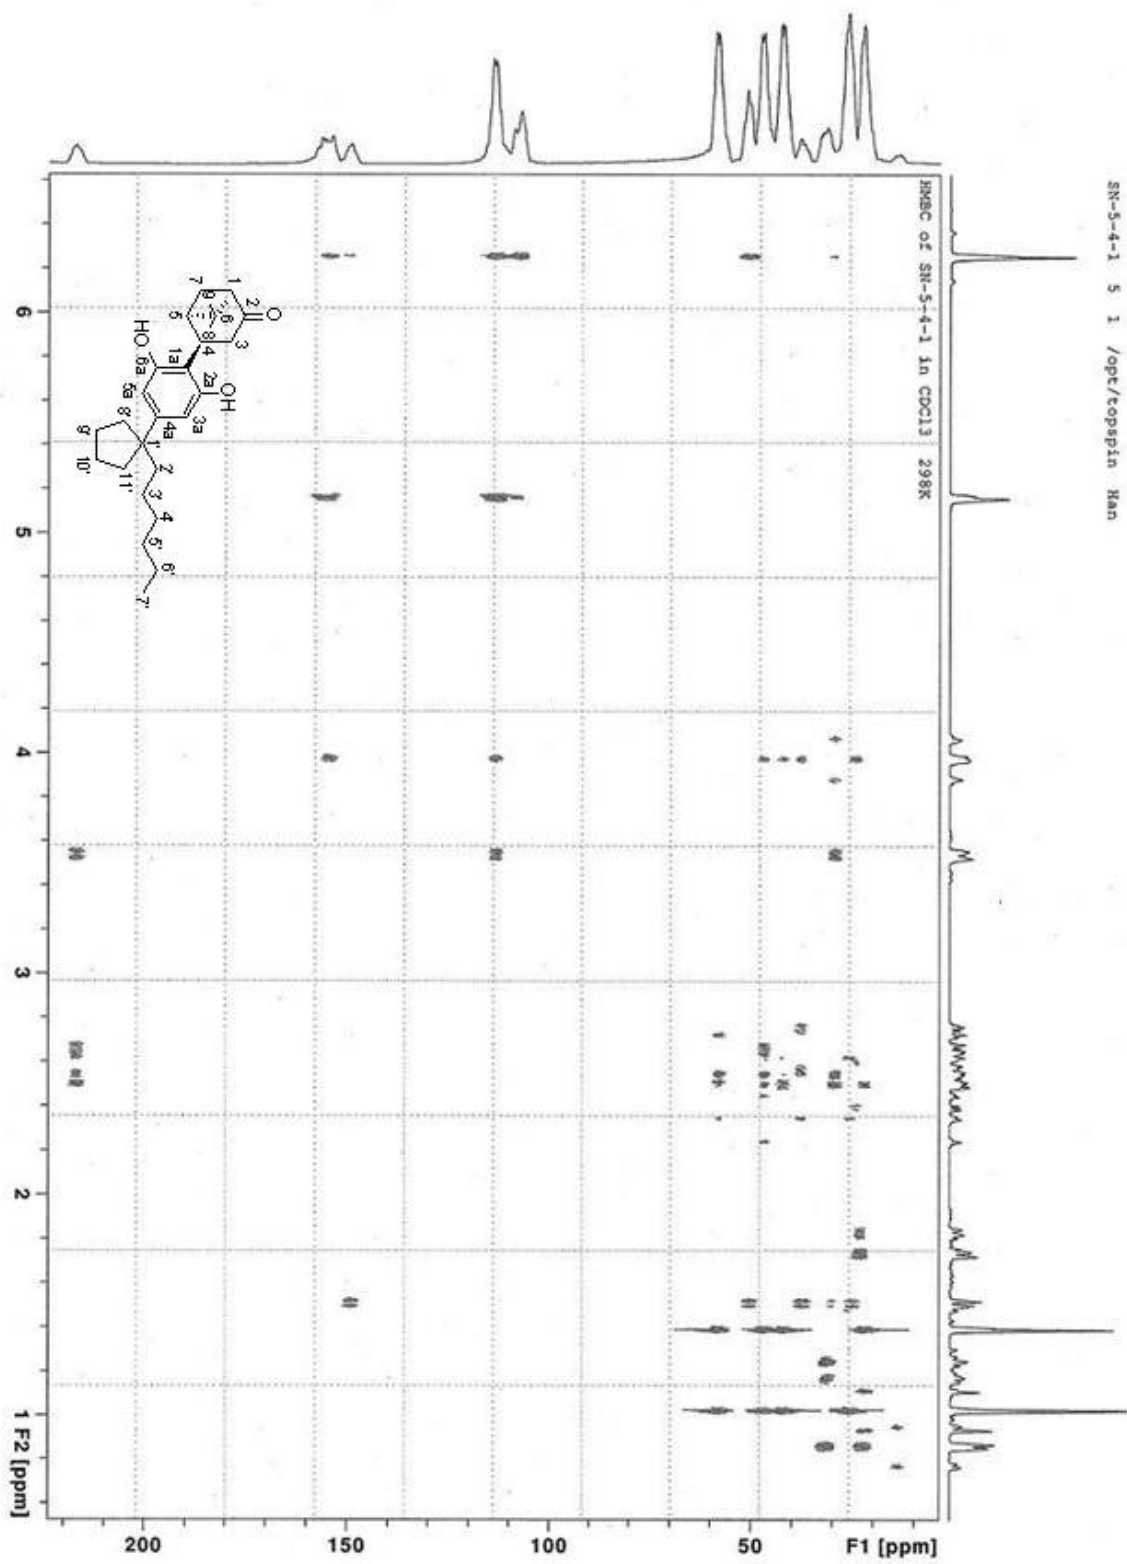

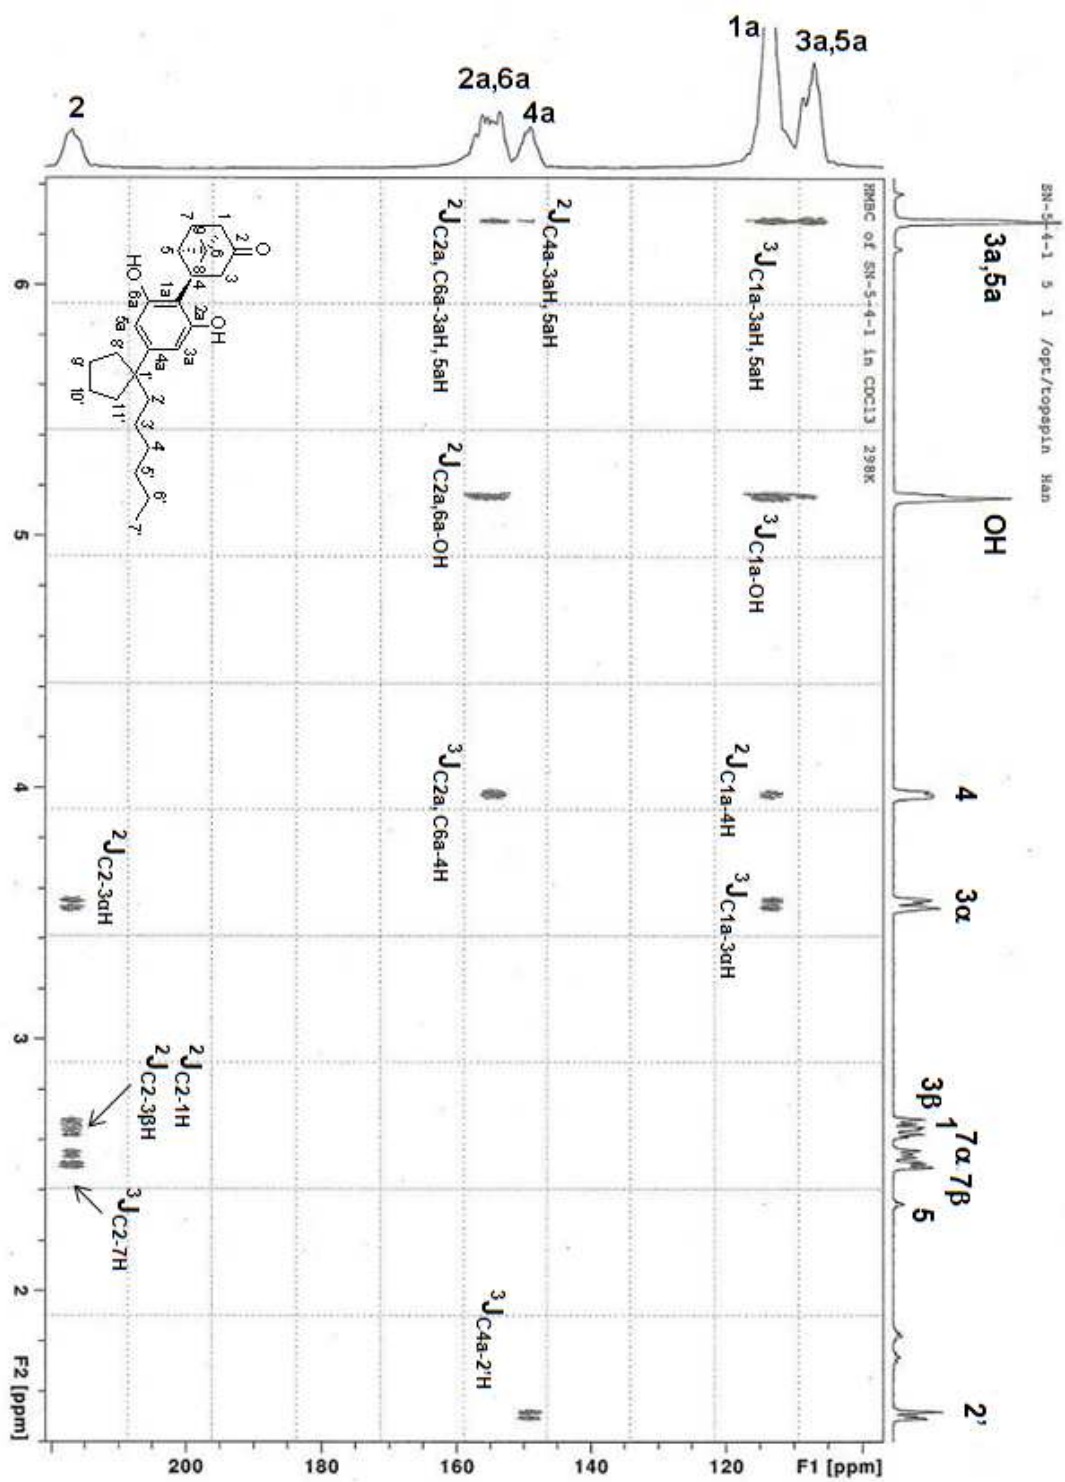

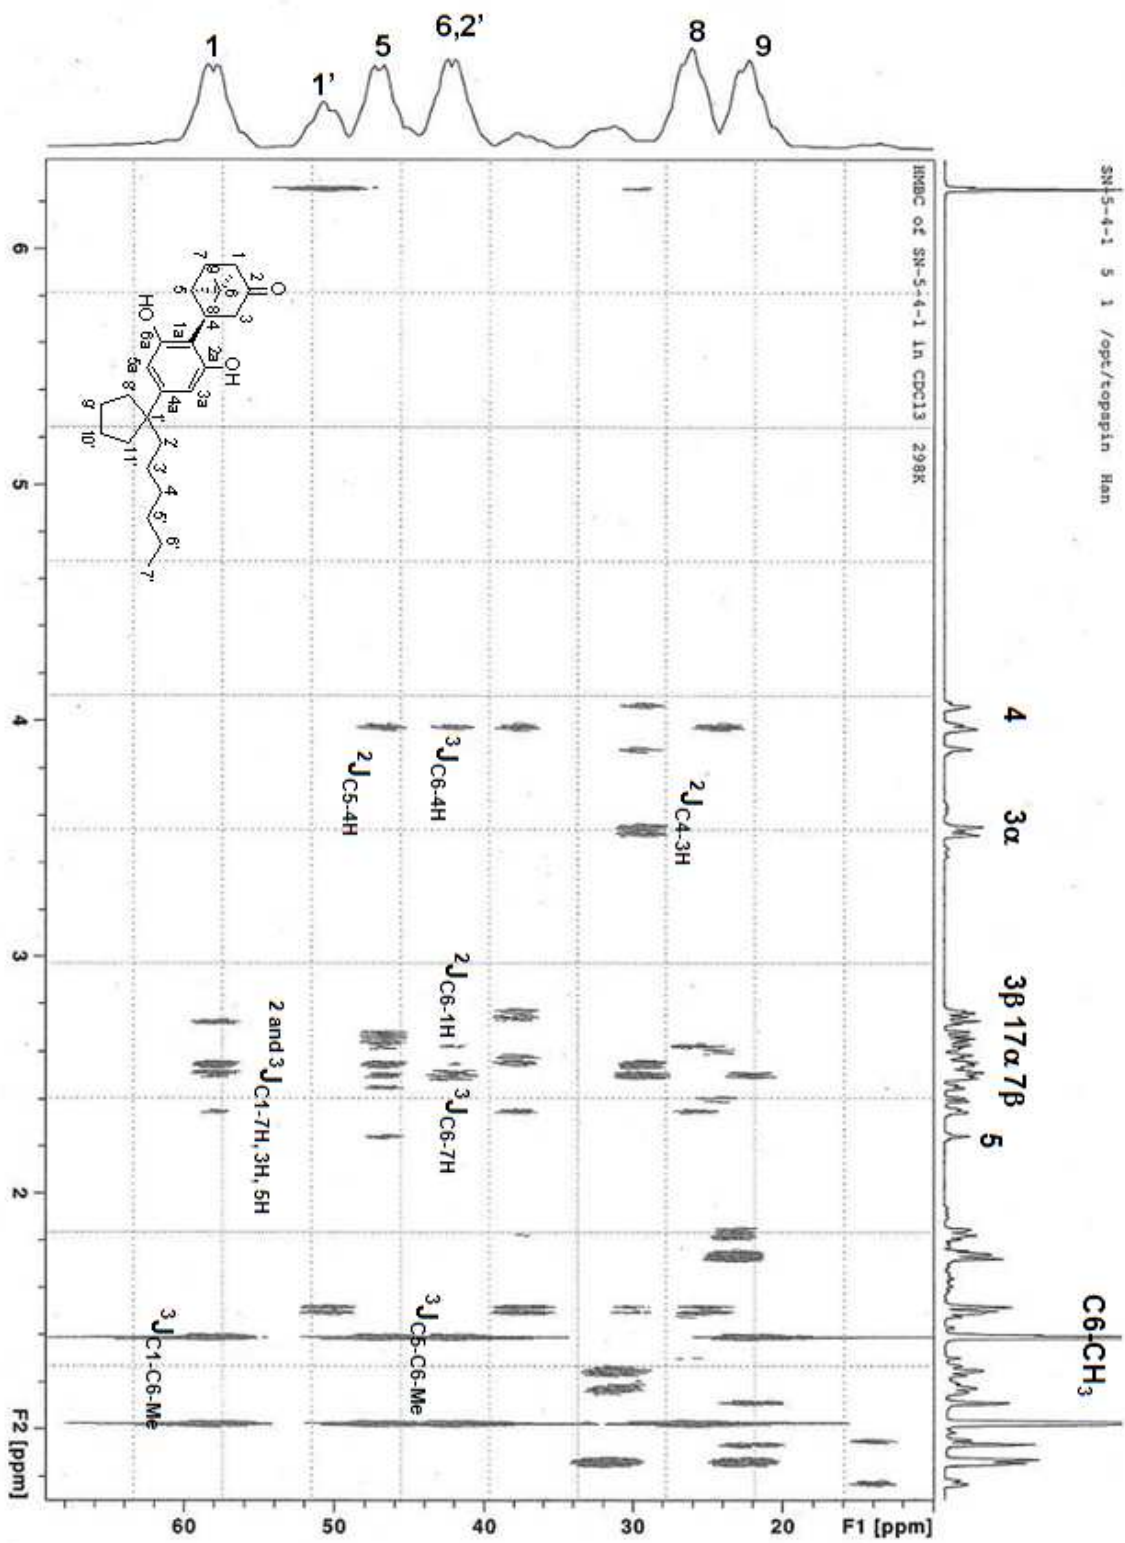

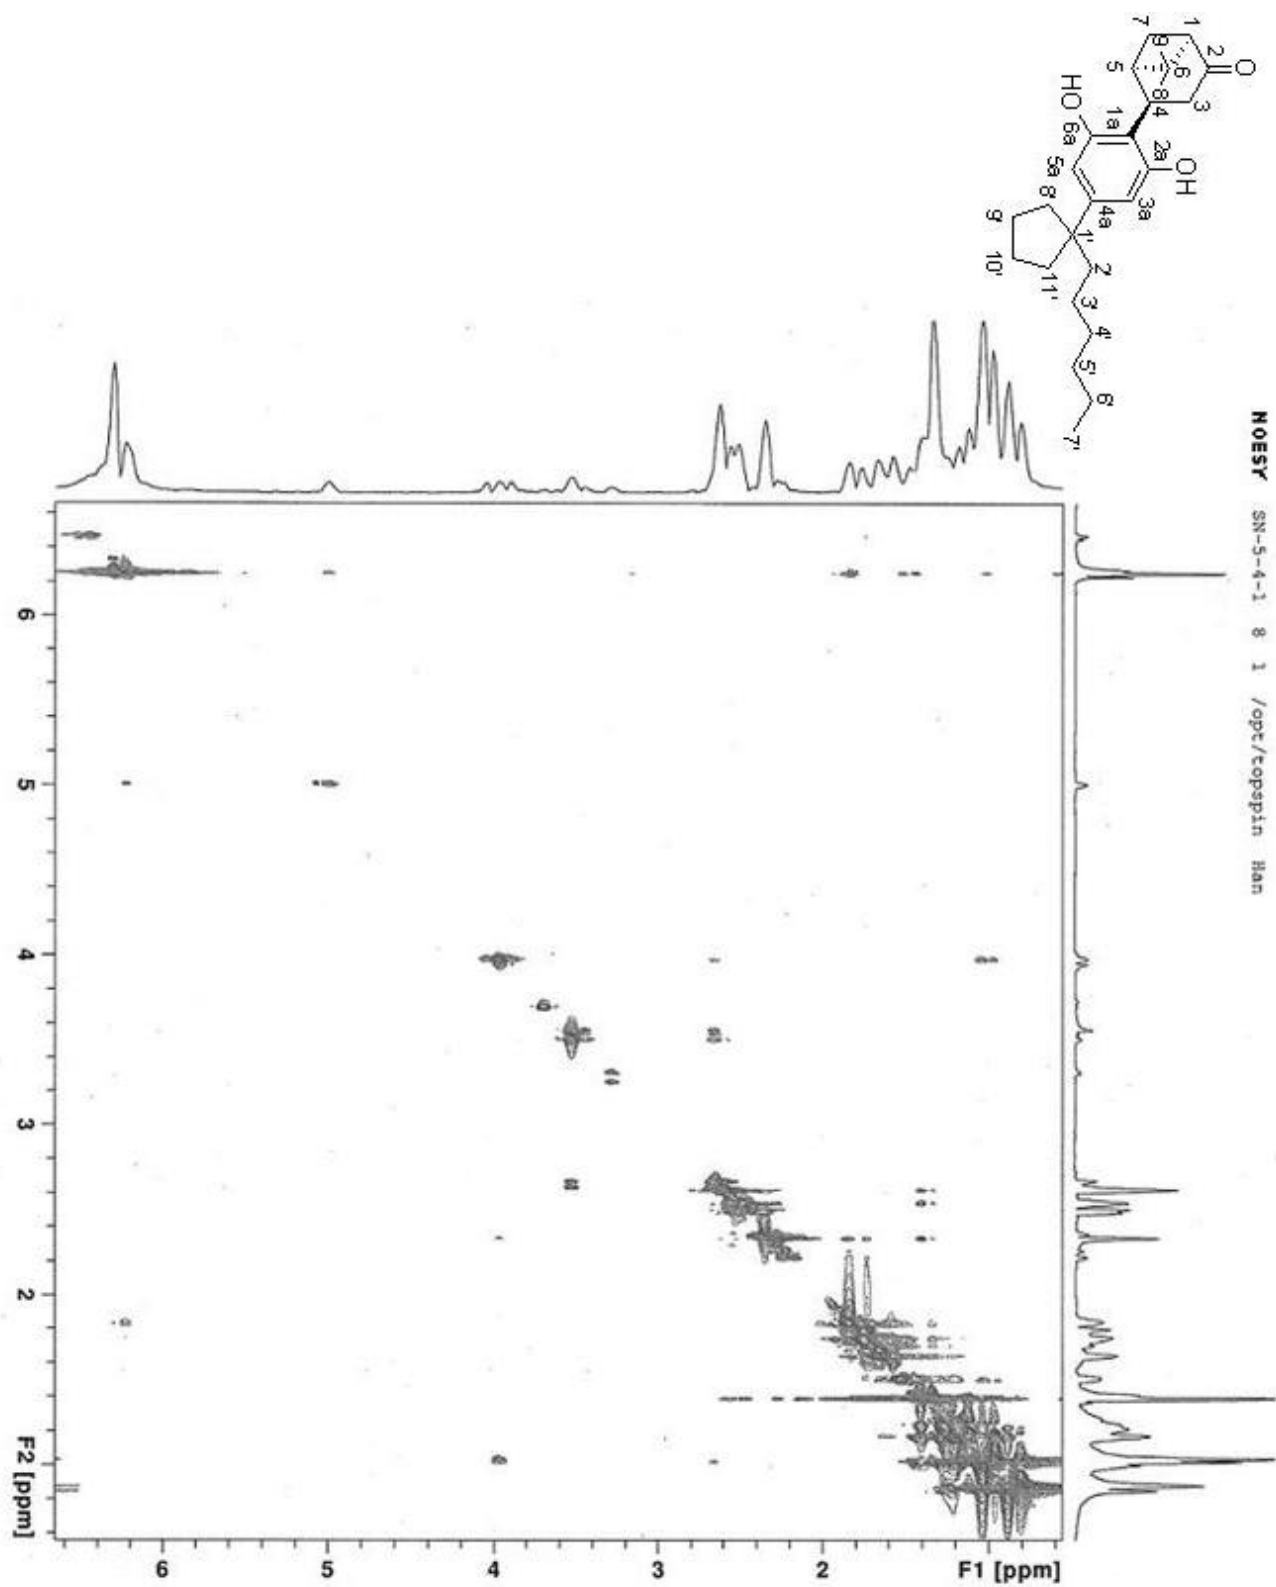

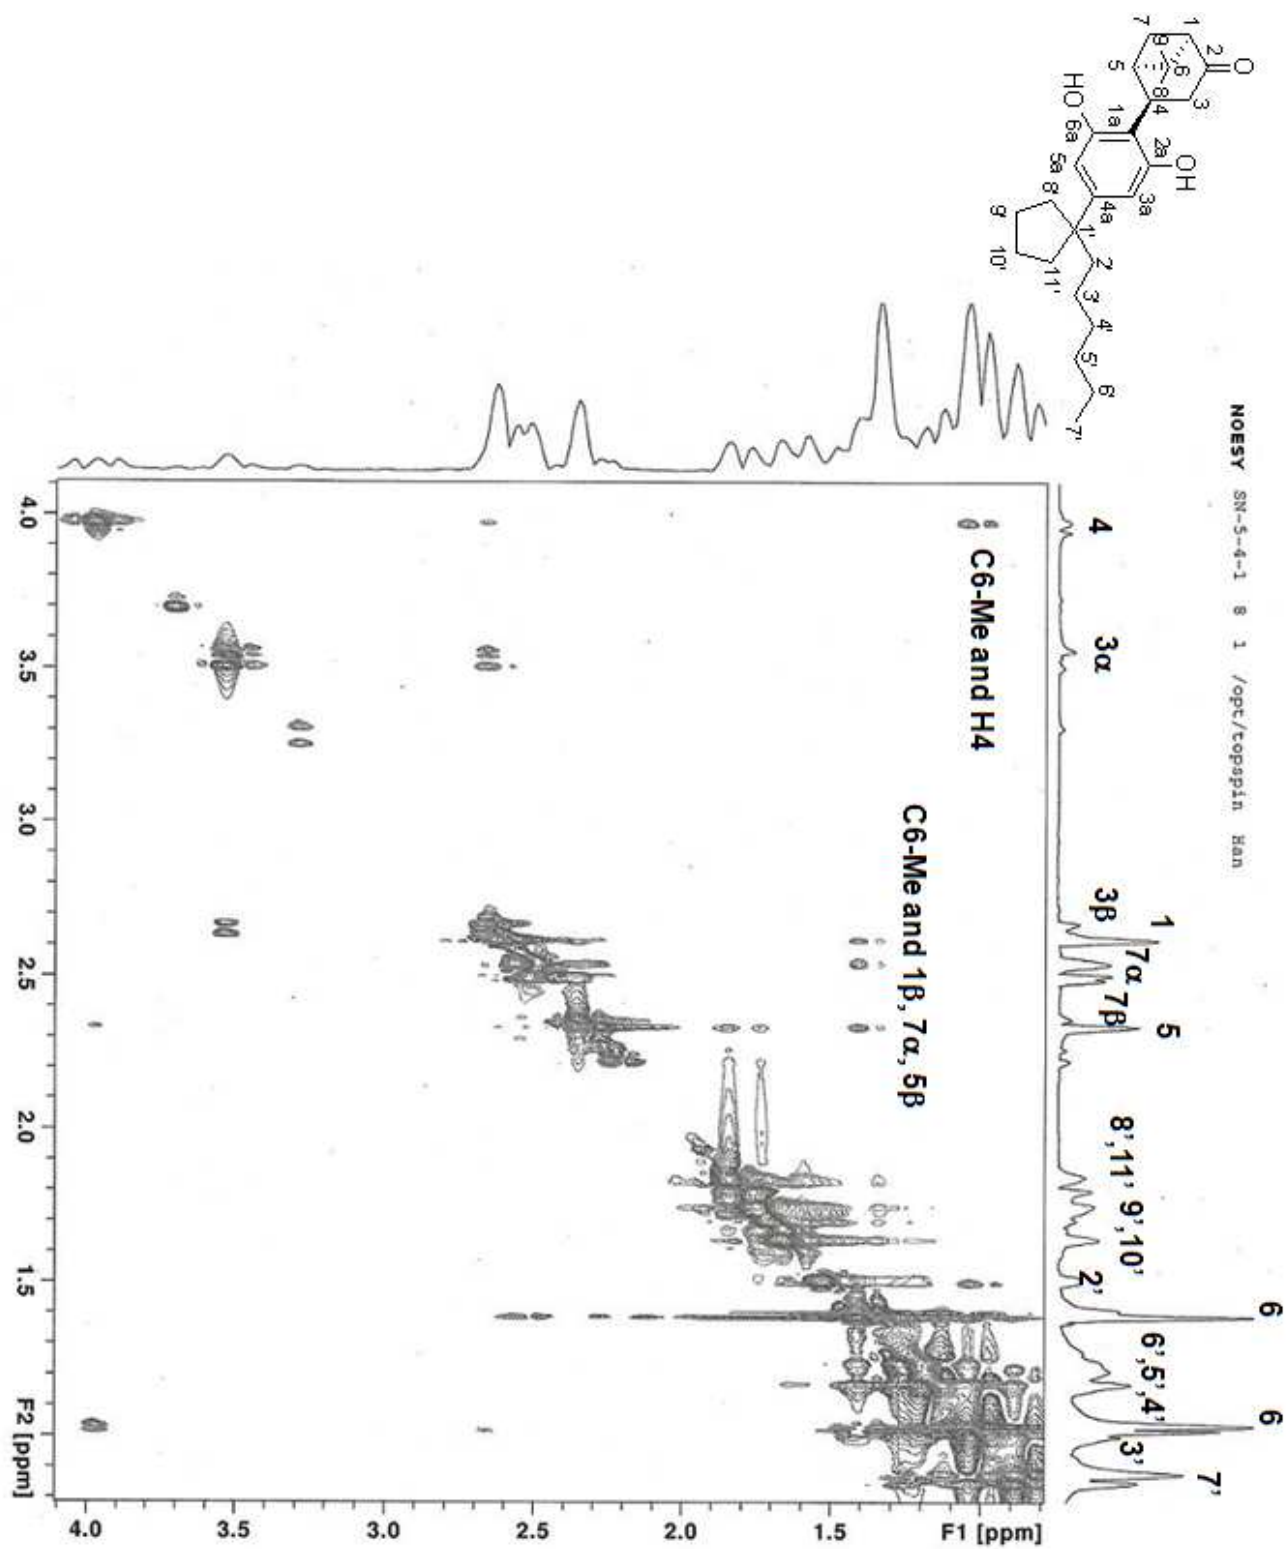

Supplement: NIHMS235894-supplement-1_si_001.pdf [file NIHMS235894-supplement-1_si_001.pdf]
